21 **ABSTRACT**

22 Modern microbial biodesign relies on the principle that well-characterized genetic parts can be reused and  
23 reconfigured for different functions. However, this paradigm has only been successful in a limited set of  
24 hosts, mostly comprised from common lab strains of *Escherichia coli*. It is clear that new applications –  
25 such as chemical sensing and event logging in complex environments – will benefit from new host  
26 chassis. This study quantitatively compared how a chemical event logger performed across multiple  
27 microbial species. An integrase-based sensor and memory device was operated by two representative soil  
28 Pseudomonads – *Pseudomonas fluorescens* SBW25 and *Pseudomonas putida* DSM 291. Quantitative  
29 comparisons were made between these two non-traditional hosts and two bench-mark *Escherichia coli*  
30 chassis including the probiotic Nissle 1917 and common cloning strain DH5 $\alpha$ . The performance of sensor  
31 and memory components changed according to each host, such that a clear chassis effect was observed.  
32 These results were obtained via fluorescence from reporter proteins that were transcriptionally fused to  
33 the integrase and down-stream recombinant region and via data-driven kinetic models. The  
34 *Pseudomonads* proved to be acceptable chassis for the operation of this event logger and actually  
35 outperformed the common *E. coli* DH5 $\alpha$  in many ways. This study advances an emerging frontier in  
36 synthetic biology that aims to build broad-host-range devices and understand the context by which  
37 different species can execute programmable genetic operations.

38

39

40

41

42

## 43 INTRODUCTION

44 Synthetic biology is built on the concept that complex biological behaviors can be programmed using  
45 relatively simple modules of biological parts. While the field of microbial biodesign has seen major  
46 advances, the overwhelming majority of parts have only been tested in model organisms. To date, we  
47 know little about how even our most standard genetic devices will perform in microbial hosts beyond  
48 common laboratory strains of *Escherichia coli* or *Saccharomyces cerevisiae*. This represents a major  
49 knowledge gap and limitation in the field. While useful for the development and demonstration of  
50 capabilities under stable laboratory conditions, these species do not survive well in many real-world  
51 applications. Most traditional microbial hosts have limited metabolic potential, preferring substrates such  
52 as simple sugars that are typically not available in environments relevant to the next generation of  
53 synthetic biology applications such as event detection within soils, built environments or the human gut.  
54 Therefore, programmable genetic devices must be expanded into new, non-traditional chassis that are  
55 already evolved to operate in complex, dynamic environments.

56 One of the most common biodesign principles is that well-characterized genetic parts – e.g.,  
57 promoters, UTRs and transcription factors – can be reused and reconfigured to program different  
58 functions. Some of the benchmark examples are given by the toggle switch<sup>1</sup>, repressilator<sup>2</sup> and previous  
59 demonstrations of integrase-based recording devices<sup>3-6</sup>; all of which were exclusively demonstrated in *E.*  
60 *coli*. These devices have laid the foundation for more applied microbial sensor-regulator-actuator devices  
61 that have been developed to detect/report signals from the mammalian gut<sup>7-8</sup> and chemical threats<sup>9-10</sup>; yet  
62 even these advanced examples relied solely on the genetic tractability of *E. coli*. Synthetic biologists are  
63 keen to harness new non-traditional hosts such as *Pseudomonas*<sup>11-13</sup>; yet, successful transplantation of  
64 broad-host-range genetic devices across multiple bacterial species has remained elusive, until now.

65 Here we present a study that demonstrates how a relatively simple chemical event logger  
66 performs across multiple microbial hosts. We chose to comparatively quantify each component of an  
67 integrase-based sensor/memory device between two *Pseudomonas* species – *Pseudomonas fluorescens*  
68 SBW25 (*Pf*) and *Pseudomonas putida* DSM 291(*Pp*) – along with two more standard *Escherichia coli*

69 strains including the probiotic Nissle 1917 (*EcN*) and common cloning strain DH5 $\alpha$  (*Ec*). The event  
70 detector was expressed from each host as the same sequence on an identical broad-host range expression  
71 vector. Here, we show that chemical event logging device can be ported across multiple species, including  
72 two Pseudomonads that open new chemical sensing/logging applications soil and plant-associated  
73 environments. The performance for each component of the device depended on the host – it was subject  
74 to a strong chassis effect. Hence, study presents a new broad-host range event logging system, which  
75 advances to a rapidly growing frontier in synthetic biology aimed at engineering devices that can function  
76 across multiple species and environments<sup>14-15</sup>.

77

## 78 **RESULTS**

79 **The broad-host range device and its components.** A two-state chemical event logger was built and  
80 quantitatively compared across each host to determine the chassis effect on performance. The device was  
81 built with specific sensor and memory components (Fig. 1a). The sensor apparatus consisted of an IPTG  
82 inducible  $P_{lac}$  promoter driving the expression of the Bxb1 serine-integrase. The Bxb1 gene was  
83 transcriptionally fused to a green fluorescent protein (GFP) to monitor the sensor's output. The  $lacI^q$   
84 transcription factor, controlling the induction of  $P_{lac}$ , was driven by the constitutive promoter,  $P_{lacI^q}$ . The  
85 memory element had two potential states that depended on the Bxb1 integrase. The initial state or “off  
86 state” was maintained by the constitutive  $P_{tac}$  promoter in the reverse orientation from its intended open  
87 reading frame, followed by a unique barcode DNA sequence. This construct was enclosed by the *attB* and  
88 an *attP* recombination sites recognized by Bxb1. The induced state or “on state” was controlled by the  
89 formation of a mature Bxb1 dimer, DNA binding and tetramer formation<sup>16</sup>, and the respective  
90 recombination of *attB* and *attP*. This process re-oriented the constitutive  $P_{tac}$  to drive expression of a red  
91 fluorescent protein (RFP). A permanent digital memory output was stored by the orientation of the  
92 barcode. The performance of the sensor and logger elements were measured by the respective GFP and  
93 RFP signals. The entire device was built into a single contig and cloned into the broad-host-range vector  
94 pBBR1MCS2<sup>17</sup> (Fig. 1b).

**Figure 1. The broad-host range event logger and its modes of operation.** (a) Expression of the Bxb1 integrase was controlled by the  $P_{lac}$  promoter and respective IPTG concentrations. Mature Bxb1 proteins dimerize and bind to DNA recombination sites ( $attB$  and  $attP$ ). The dimers on the two ends of the recording element join to form a tetramer in a synaptic event that folds the DNA in the process. DNA strands are exchanged when Bxb1 monomers trade positions, flipping the internal region, which contains both a barcoded digital recorder and a constitutive  $P_{tac}$  promoter. The new sites,  $attL$  and  $attR$  – formed in the process of DNA flipping – can no longer stay attached to the Bxb1 dimers because of altered sequence, therefore release the dimers in an irreversible digital recording process. GFP and RFP reporter genes were transcriptionally fused onto the IPTG inducible sensor and recording recombination sites. (b) Map of the device with the sensor and memory components cloned in place of the  $lacZ$  gene on the  $pBBR1MCS2$  broad-host-range vector.

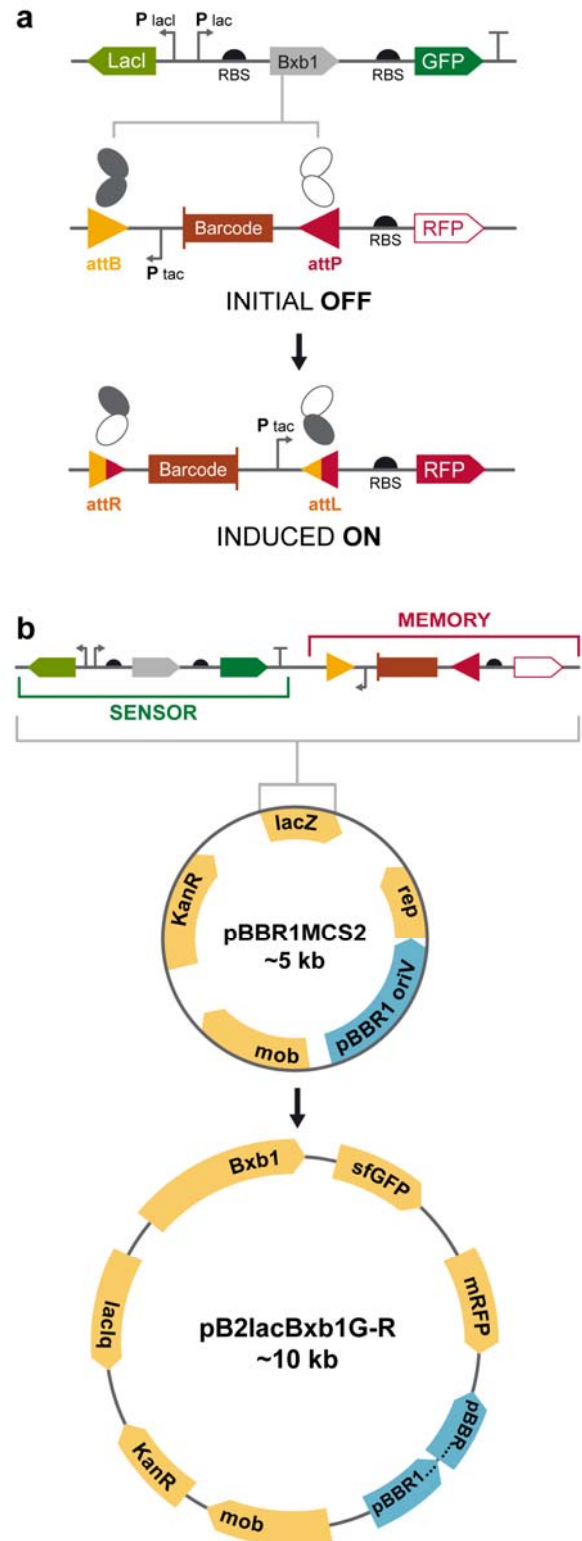

96 **Quantifying the chassis effect.** The device was operational across each of the four species. Performance  
97 of each component – sensor and logger – was assayed at eight different IPTG concentrations (0 – 1 mM)  
98 by measuring the respective mean GFP and RFP signals (Fig. 2). Total growth was also measured  
99 simultaneously via optical density (OD<sub>600 nm</sub>). The specific growth rates ( $\mu$ ) showed that each species –  
100 except *EcN* ( $\mu = 1.087 \pm 0.017 \text{ h}^{-1}$ ) – had very similar growth under these conditions: *Ec* ( $0.427 \pm 0.016$   
101  $\text{h}^{-1}$ ), *Pp* ( $0.439 \pm 0.0436 \text{ h}^{-1}$ ) and *Pf* ( $0.508 \pm 0.019 \text{ h}^{-1}$ ) (Supplemental Fig. S1a). The standard deviations  
102 represent the variation in growth rates across all IPTG treatments and ranged from approximately 1.5% to  
103 10% of mean values. The induction strength of the device – controlled by IPTG concentration – showed  
104 no effect on the specific growth rate. While this indicates that there was little additional metabolic load  
105 with respect to IPTG induction, the plasmid encoded device itself imposed a significant metabolic burden  
106 on both *Pseudomonas* hosts. This was apparent from the wild-type growth rates of these species,  
107 measured at  $0.759 \pm 0.017 \text{ h}^{-1}$  and  $1.127 \pm 0.012 \text{ h}^{-1}$  for *Pf* and *Pp* respectively (Supplemental Fig. S1b);  
108 much higher than the respective engineered strains. In contrast, there was very little change in specific  
109 growth rate of the engineered *E. coli* hosts compared to their respective wild-types ( $0.412 \pm 0.012 \text{ h}^{-1}$  and  
110  $0.979 \pm 0.022 \text{ h}^{-1}$  for *Ec* and *EcN* respectively). This was likely due to the fact that both *Pp* and *Pf* had  
111 considerably higher levels of RFP as compared to each *E. coli* host.

112 The sensor apparatus showed a higher dynamic response to IPTG induction when expressed from  
113 *E. coli* as compared to *Pseudomonas* hosts (Fig. 2a). Both *Pseudomonas* species had almost identical  
114 responses to IPTG and a higher degree of basal expression of GFP (measured at in the absence of IPTG)  
115 as compared to each *E. coli* host. We initially thought that this was due to the natural fluorescence of each  
116 *Pseudomonas* species near the 509 nm maximum emission of GFP. However, fluorescence measurements  
117 of the wildtype hosts proved too low to account for this anticipated basal activity. Hence, this was  
118 attributed to leaky expression  $P_{lac}$  within both *Pseudomonas* hosts. The dynamic ranges of the sensor  
119 component were much narrower in the *Pseudomonas* hosts (RFU<sub>max</sub> within range of 10000) as compared  
120 to *Ec* and *EcN*, which exhibited ranges of 20000 and 45000, respectively. This was anticipated from the

121 design of the device as it used  $P_{lac}$ , which is optimized for tight transcriptional response and high dynamic  
122 ranges in *E. coli*. However, *Ec* – a common cloning strain and chassis for synthetic biology applications –  
123 showed the lowest performance with respect to operating the sensor component of the device as shown by  
124 the maximum GFP fluorescence achieved ( $RFU_{max}$  at 1 mM IPTG of about 20000) (Fig. 2a).

125 While the sensor portion of the device behaved predictably in each chassis, the memory apparatus  
126 – measured via RFP fluorescence – performed differently and showed a significant chassis effect.  
127 Interestingly, *Ec* was the lowest performing host from this study, both in terms of dynamic range and  
128 maximum fluorescence. In fact, it had a dynamic range and maximum RFU about 24 times lower than the  
129 best performing host, *Pf* (Fig. 2a). In general, the memory component performed much better in the  
130 *Pseudomonas* hosts as compared to each *E. coli* host; *Pp* and *Pf* achieved respectively 3- and 6-times the  
131 maximum RFP fluorescence than *EcN* (Fig. 2b).

132 Another important performance metric for cross-chassis comparison was the time scale of  
133 induction (Fig. 2b). This was quantified by the activation coefficient, which is the time for fluorescence to  
134 reach half maximum at a given IPTG concentration<sup>18</sup>. These had very different profiles than maximum  
135 relative fluorescence measurements. *EcN* showed the fastest induction time, but was largely flat; the half  
136 saturation time at 0.01 mM IPTG ( $6.17 \pm 0.17$  h) was similar to that at 1 mM IPTG ( $6.26 \pm 0.32$  h). For  
137 others, the activation coefficient decreased with increasing IPTG concentration and approached a  
138 minimum value at the highest IPTG concentrations. Minimum GFP half saturation times were  $11 \pm 0.17$   
139 h,  $12.34 \pm 0.096$  h and  $15.09 \pm 0.22$  h for *Pf*, *Ec* and *Pp* respectively at 1 mM IPTG. RFP fluorescence  
140 followed a similar pattern, corresponding directly to induction of  $P_{lac}$  by IPTG. This result is evidence that  
141 the expression of Bxb1 – thus  $P_{lac}$  strength – was the rate limiting step in the process from induction by  
142 IPTG to DNA flipping.

143

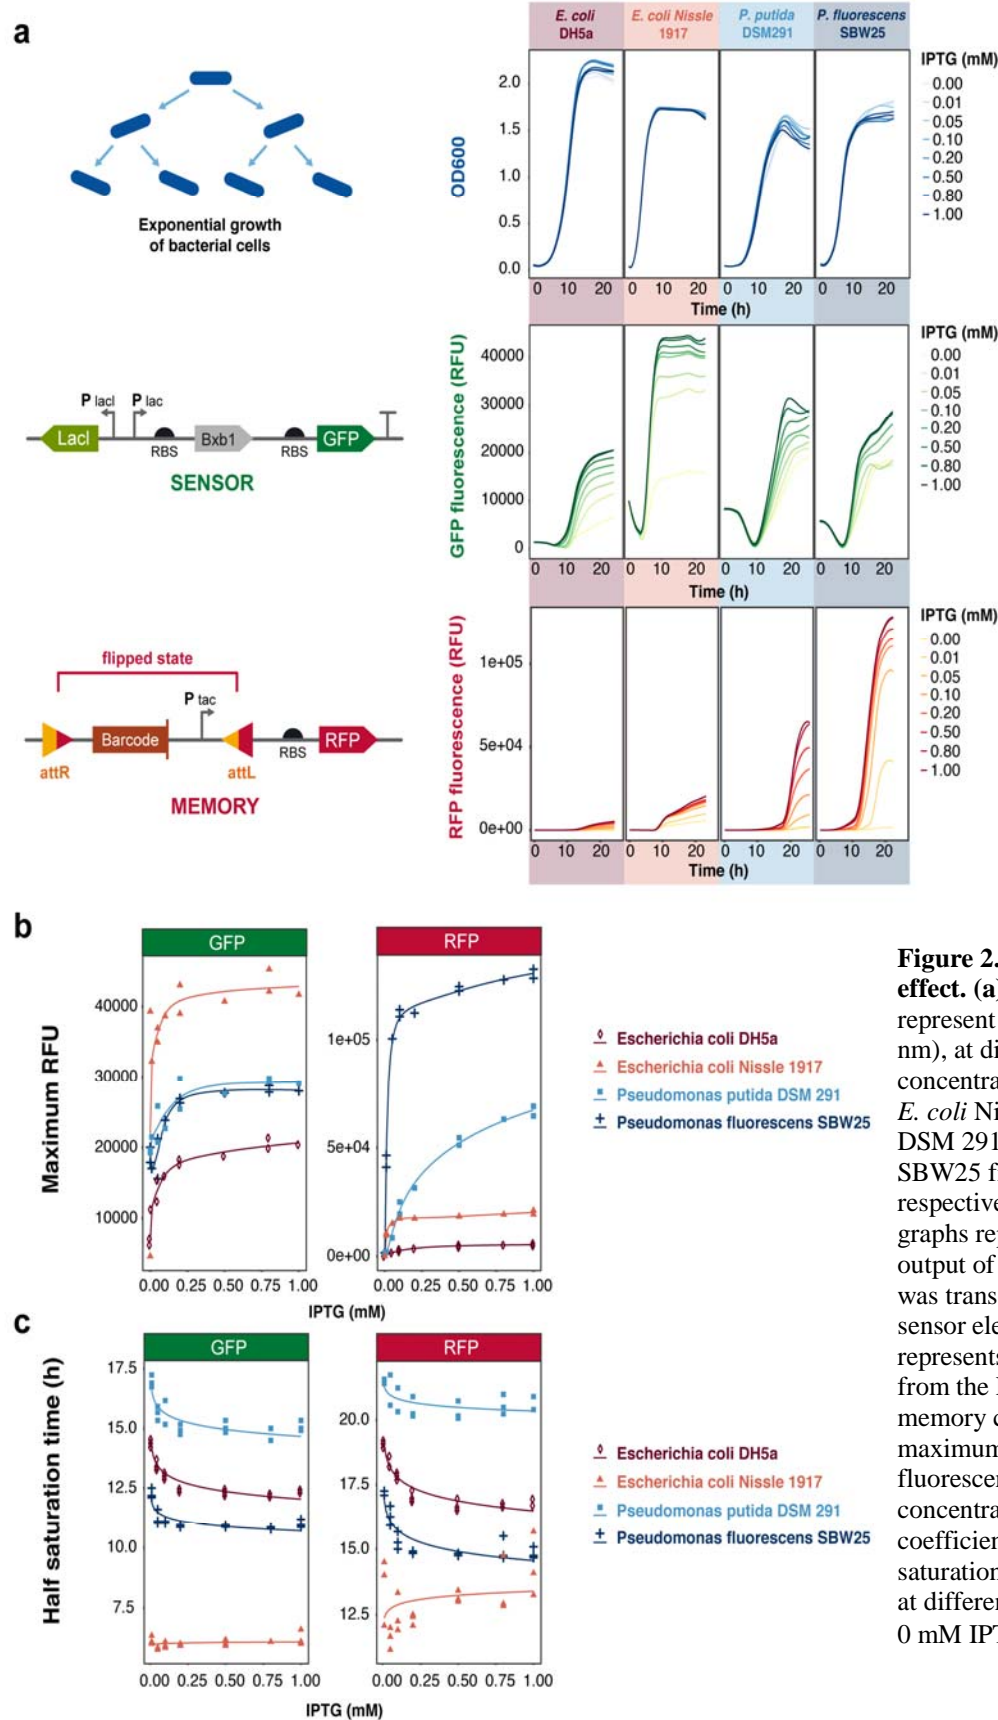

**Figure 2. Quantifying the chassis effect.** (a) The top four panels represent cell growth (OD600 nm), at different IPTG concentrations, of *E. coli* DH5a, *E. coli* Nissle 1917, *P. putida* DSM 291 and *P. fluorescens* SBW25 from left to right respectively. The middle row of graphs represents the fluorescence output of the GFP reporter that was transcriptionally fused to the sensor element; the bottom row represents the fluorescence output from the RFP that was fused to the memory component. (b) The maximum GFP and RFP fluorescence at different IPTG concentrations. (c) The activation coefficient shown as half-saturation times of GFP and RFP at different IPTG concentration (> 0 mM IPTG).



145 **Population-based comparisons.** Population-level measurements for the memory component of the  
146 device showed that while the *Pseudomonas* hosts exhibited stronger RFP output signals, the stability of  
147 the device was better in each *E. coli* chassis. This result was obtained via flow cytometry measurements  
148 taken from each host over five time points sampled over 26 h at five distinct IPTG concentrations. The  
149 results showed bimodal distribution of each host at the initial time point, prior to IPTG induction. This  
150 was likely a result from basal levels of RFP expression in a portion of the cells held in the ‘off’ state.  
151 However, while the 0 mM IPTG treatments showed this bimodal distribution remaining essentially  
152 constant for *Ec* and *EcN*, both *Pp* and *Pf* shifted significantly after ~12 h to favor an increasing number of  
153 cells fluorescing RFP signal (Fig. 3). This represents a false trigger of the event logger after extended  
154 periods of time and is consistent with the interpretation of leaky expression of the *P<sub>lac</sub>* promoter observed  
155 by the *Pseudomonas*-specific GFP-Bxb1 transcriptional fusion signals (Fig. 2a). The maximum  
156 performance period of the memory device – as assayed by the time corresponding to maximum RFP  
157 signal from the flow cytometer measurements – was between 10 and 14 h for each host with the exception  
158 of *Pp*, which showed a peak at the 26 h measurement. This observation is consistent with stationary  
159 growth (post-log-phase), as observed from the optical density measurements. Hence the dampened RFP  
160 signal as well as the apparent device instability in *Pseudomonas* was only observed during stationary  
161 growth and/or slight losses in cell density by 20 h, as seen for *Pp* (Fig. 2a).

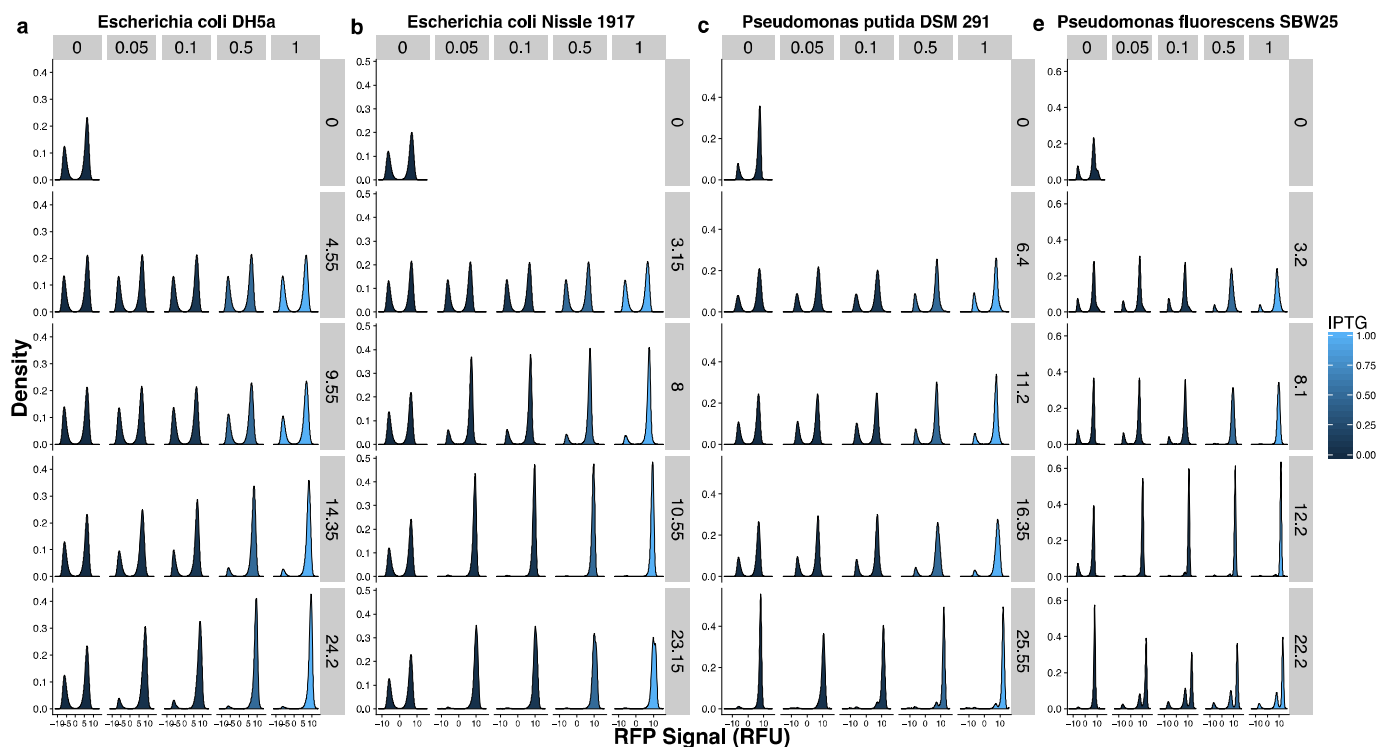

**Figure 3. Population-based measurements of RFP reporting of signal recording across hosts.** (a) *Escherichia coli* DH5 $\alpha$ , (b) *Escherichia coli* Nissle 1917, (c) *Pseudomonas putida* DSM 291 and (d) *Pseudomonas fluorescens* SBW25. The rows in each of the panels correspond with sampling times in hours and columns are the IPTG concentrations given in mM. The first row in each plot shows data from the induction state from each experiment (0 h).

162

163 **Simulations and performance metrics across chassis.** A kinetic model was formulated to help quantify

164 how individual components of the event logger performed across each chassis. Similar to the physical

165 construction of the device the model was broken out into the respective sensor and memory component

166 categories. The sensor part of model included expressions that accounted for IPTG induction of the Bxb1

167 integrase (given as  $I$ ) and GFP as shown by Equations 1 and 2.

168

$$169 \quad \frac{dI}{dt} = P - \mu * I - D * I \quad (\text{Eq. 1})$$

$$170 \quad \frac{dGFP}{dt} = P - \mu * GFP - D * GFP \quad (\text{Eq. 2})$$

$$171 \quad P = P_A + P_B \ln([IPTG] + P_C) \quad (\text{Eq. 3})$$

172

173 The relationship between IPTG concentration and promoter activity is given by Equation 3, where  $P$   
174 represents the activity of  $P_{lac}$ . It was found that this type of behavior adequately described the  
175 fluorescence output from the device.  $D$  is the protein degradation constant and  $\mu$  is the specific growth  
176 rate, which accounts for dilution effects incurred by cell growth.

177 The memory component of the device was modeled by Equations 4 and 5, where  $PB$  is the  
178 fraction of un-flipped DNA and  $LR$  is the fraction of flipped DNA;  $k_{flip}$  is the rate constant for integrase-  
179 mediated recombination (flipping). We assumed that the plasmid copy number of each host was  
180 equivalent and that there existed an un-flipped induction state at the beginning of the experiment.

181

$$182 \quad \frac{dPB}{dt} = -k_{flip} * PB * I^4 \quad (\text{Eq. 4})$$

$$183 \quad LR = 1 - PB \quad (\text{Eq. 5})$$

184

185 The rate constant,  $k_{flip}$  encompasses three-time steps: 1) the time required for the integrase ( $I$ ) to form a  
186 tetramer; 2) the time required for binding of the tetramer to the DNA ( $PB$ ) and 3) the DNA flipping event.

187 The overall readout from the memory component of the device was given by expression of RFP (Equation  
188 6), which is analogous to Eq. 2 describing GFP, with the exception of the non-inducible  $tac$  promoter  
189 ( $P_{RFP}$ ).

190

$$191 \quad \frac{dRFP}{dt} = P_{RFP} - \mu * RFP - D * RFP \quad (\text{Eq. 6})$$

192

193 This model adequately explained the operation of the genetic device and fitted distinct parameters for  
194 each respective host. This was especially evident by the degree to which the model could be fit to the GFP  
195 and RFP time series data; each respective output from the sensor and memory components of the device  
196 (Fig. 4ab). However, the model's ability to capture the dynamics of DNA flipping was variable between  
197 each of the hosts (Fig. 4c). We observed significant scatter derived from the qPCR assays that were

198 designed to measure the orientation of the barcoded DNA associated with the digital memory read-out.  
199 These data were collected to determine the fraction of flipped DNA. The noise in the measurement likely  
200 resulted from variability the plasmid recovery and purification from each host. Yet, the model still  
201 conveyed the overall the pattern for which IPTG induction instigated barcode flipping for each of the  
202 hosts and did a reasonably good job at fitting most of the data derived from each time series  
203 measurement.

204 Overall, the models helped show that the *Pseudomonas* hosts had favorable kinetics for operating  
205 this device despite the fact the genetic parts have been largely developed and optimized in *E. coli*.  
206 Surprisingly, the simulations showed that *Ec* – the bench mark chassis – had the most unfavorable  
207 kinetics. The probiotic strain, *EcN* showed the strongest ability to operate the sensor component of the  
208 device and was unique with respect to the suite of hosts tested in this study. This could be ascertained by  
209 combining the modeled predictions with experimental measurements. For instance, the simulated  
210 promoter strength of  $P_{lac}$  (see Eq. 3) showed that *Ec*, *Pp* and *Pf* are aligned with similar profiles, while the  
211 values of  $P$  for *EcN* were estimated to be about 4 times higher for any given concentration of IPTG. This  
212 result was consistent with independent and direct measurements of specific growth rates (Supplemental  
213 Fig. S1); *EcN* showed the fastest specific growth rate and should therefore have the highest dilution of  
214 expressed GFP protein leading to decreased fluorescence. Yet, *EcN* also showed the highest fluorescence.  
215 Thus, the strength of  $P_{lac}$  would need to be much higher to account for these opposing effects – as shown  
216 by the model.

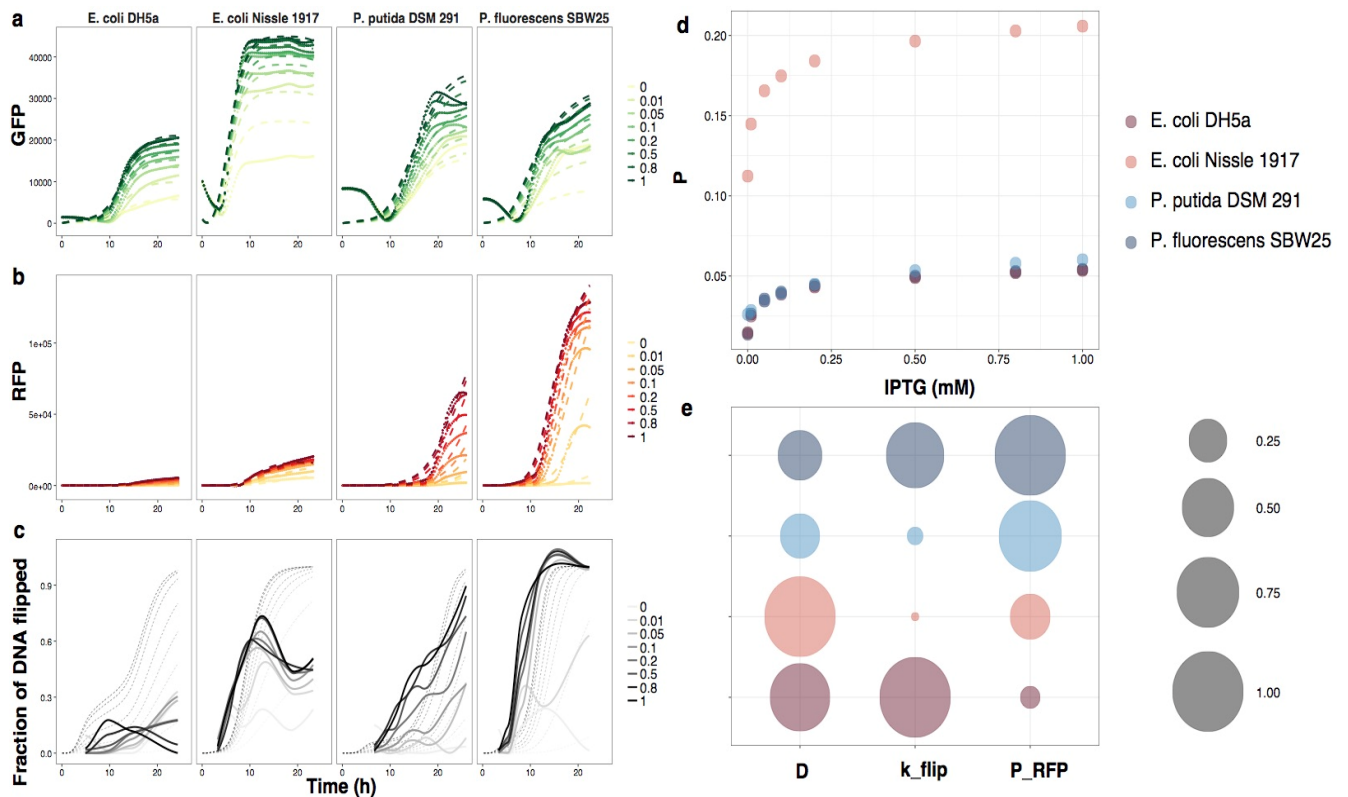

**Figure 4. Comparative kinetics show chassis-dependent performance.** The model outputs (dotted lines) of (a) the sensor component as fit by GFP fluorescence data; (b) the memory component as fit by RFP fluorescence; and (c) the memory component as fit by the fraction of DNA flipped (qPCR measurements). Each simulated time trace (panels a through c) are overlaid on the respective data typed used to parameterize the model (solid lines). (d) The promoter strength of  $P_{lac}$  (given in the model as  $P$ ) calculated from estimated model parameters,  $P_A$ ,  $P_B$  and  $P_C$ , plotted against IPTG concentration. (e) Comparison of simulated kinetic parameters for the protein degradation constant ( $D$ ); flipping constant ( $k_{flip}$ ) and strength of the constitutive  $P_{lac}$  promoter ( $P_{RFP}$ ) compared across each host.

217

## 218 DISCUSSION

219 Synthetic biologists commonly (re-)discover that even the most well-characterized genetic parts often will  
 220 not function in a predictable manner when taken out of the context from which they were originally  
 221 characterized. For any given host, this unpredictability can arise from interference between genetic parts  
 222 that have been introduced as well as cellular noise inherent to the native biological system<sup>19-20</sup>. Yet, the  
 223 degree to which these factors are influenced by the biology of any given microbial species requires that  
 224 the same genetic parts be used and compared across multiple hosts. Here, we showed that an identical  
 225 genetic device can be ported across multiple microbial species and that its performance is host-dependent.  
 226 We chose to deploy a relatively simple event logger and experimental design, which has enabled this

227 study to demonstrate emerging capability of broad-host-range genetic devices. While it is clear that more  
228 species and devices need to be tested before a broad-host-range capability matures, this early step is an  
229 important contribution towards alleviating our current dependency and limitations on very small subset of  
230 model microbes.

231 Despite the fact that *E. coli* DH5a is a common tool for the design and implementation of modern  
232 genetic devices, we found that in many ways it was the least ideal host tested in this study. In fact, a  
233 primary finding was that – compared to *Ec* – the two *Pseudomonas* species (*Pp* and *Pf*) showed  
234 reasonable potential as chassis for chemical event logging even though the majority of previously  
235 published reports on the parts used to build the device have only considered *E. coli*<sup>3-4, 6, 21</sup>. This is a  
236 promising result as these and closely related *Pseudomonads* are known to have tremendous metabolic  
237 potential for the synthesis of novel compounds<sup>22-23</sup>, consuming complex substrates<sup>24-25</sup> and persisting in a  
238 wide range of habitats that include soils, plant tissues and marine ecosystems<sup>26-29</sup>. Expanding the synthetic  
239 parts list for *Pseudomonas* species will undoubtedly enable new biotechnological applications that should  
240 include chemical sensing and event logging in complex natural environments.

241 *E. coli* Nissle 1917 was also chosen for comparative analysis in this study because it served as an  
242 intra-species comparator to *Ec*. It was also chosen because of its growing importance in the biodesign  
243 community based on the fact that it is a commonly used probiotic<sup>30</sup> and highly genetically tractable.  
244 Researchers are rapidly uncovering many exciting opportunities to use *EcN* and other probiotic-hosts as  
245 programable therapeutic agents and/or diagnostic tools for human health<sup>31-33</sup>. In some cases, differences in  
246 intra-species performance – within *E. coli* strains – exceeded inter-species variability. This was somewhat  
247 unexpected and specifically evident from comparisons made on the sensor component of the device,  
248 which performed better in *EcN* as compared to *Ec* and both *Pseudomonas* hosts. This was specifically  
249 evident by comparing the kinetics associated with the sensor apparatus and indicates that *EcN* maintained  
250 the tightest control and largest dynamic ranges of the IPTG inducible components of the device.

251 Kinetic parameters estimated from the model provided a good quantitative comparison of  
252 biological properties that cannot be easily measured (Fig. 4e). For instance, the degradation constant, *D*, is

253 found to be fairly similar in all the hosts, which is hardly surprising considering the standardized growth  
254 conditions and similar growth rates. Estimates of the flipping rate constant ( $k_{flip}$ ), however, were highly  
255 variable. In contrast to  $D$ , which is more indicative of cellular physiology,  $k_{flip}$  is more representative of  
256 the device-specific kinetics. This parameter depends on a number of biological factors such as codon  
257 usage, transcription, translation, protein folding as well as the efficiency of Bxb1-mediated  
258 recombination. Based on the model-enabled predictions,  $EcN$  stood out with a very small  $k_{flip}$  values;  
259 about 89 times smaller than the largest value attributed to  $Pf$ . Its high transcription rate (given by  
260 estimates of  $P$ ) and low  $k_{flip}$  account for the observation of fast DNA flipping after initial induction  
261 followed by relatively immediate saturation (Fig. 4c). The  $k_{flip}$  values of  $Ec$  and  $Pp$  are moderate but the  
262 reason for the higher value of  $Ec$  relative to  $Pp$  is still somewhat uncertain since the fraction of DNA  
263 flipped is higher in  $Pp$  than  $Ec$ . The fourth parameter,  $P_{RFP}$ , is the measure of the strength of  $P_{tac}$  promoter  
264 and varies in the same way as RFP fluorescence. This promoter was actually found to work better – as  
265 assayed by the strength or RFP fluorescence – in the *Pseudomonads* than *E. coli* species.

266         Integrated data and kinetic modelling approaches are useful for quantifying and comparing  
267 performance across hosts. One limitation, however, was that our approach contained few species-specific  
268 physiological parameters. The exception to this is the specific growth rate ( $\mu$ ). Although the hosts in this  
269 study all showed similar growth rates, the specific growth rate should prove to be an important  
270 consideration when evaluating the performance of a device as hosts and growth conditions change. It was  
271 also interesting that we were able to observe and simulate dynamics in the device's performance while the  
272 cells were in stationary phase. Often, experimental observations made on engineered devices are only  
273 contextualized during log growth phases. However, future applications such as chemical event logging in  
274 dynamic environments will be better served by understanding how chassis/device pairs may function  
275 through lag, log and stationary phases of growth. This is a point that shall require more deserving  
276 attention in future studies.

277         The field of microbial biodesign is keen to harness new, non-traditional hosts for synthetic  
278 biology applications. Some significant advancements towards programing genetic devices – including

279 sensors – have already been shown in other non-traditional microbial hosts. Of specific note are previous  
280 success shown in a human gut microbe *Bacteroides thetaiotaomicron*<sup>34</sup> and a suite of proteobacteria  
281 isolated from a bee gut microbiome<sup>35</sup>. Here in this current study, we have advanced an emerging concept  
282 of broad-host-range genetic devices. While this is certainly a new frontier, some notable examples have  
283 preceded this current report including a study by Kushwana and Salis that that presented the concept of  
284 “portable power supplies” between species and demonstrated that some genetic parts can ported between  
285 *E. coli*, *P. putida* and *Bacillus subtilis*<sup>14</sup>. Another important avenue has been the pursuit of broad-  
286 spectrum genetic parts such as the promoters presented in a study from Yang et al. that are operational  
287 between *E. coli*, *B. subtilis* and *S. cerevisiae*<sup>15</sup>. The efforts to date – including our current study – have  
288 only considered a relatively small set of microbes. Future developments on cross-chassis devices may  
289 encounter new technical hurdles as the taxonomic diversity of hosts are expanded. Once harnessed, the  
290 concept of broad-host-range genetic devices should also bring new species-specific-applications. The  
291 major technical hurdle that will need to be overcome for developing chemical sensing capabilities will be  
292 the discovery or engineering of genetic components with specificity for analytes of real-world interest.  
293 The current suite of commonly used transcriptional factors and inducible promoters are clearly limited.  
294 New parts discovery and characterization efforts are sorely needed to advance the current state of  
295 microbial biodesign.

296

297 **Conclusions.** We quantified the chassis effect of an integrase-based chemical event logger across  
298 multiple species and two different Genera – *Pseudomonas* and *Escherichia*. The performance of sensor  
299 and memory components changed according to each host as ascertained via integrated experimental  
300 measurements and outputs from kinetic models. Specifically, *EcN* – a common probiotic bacterium –  
301 showed the tightest control and most stability of the sensor apparatus that regulated expression of the  
302 Bxb1 integrase. Both *Pseudomonas* hosts showed greater RFP output signals that corresponded with  
303 Bxb1-mediated recombination in the memory component of the device. A primary finding of this study  
304 was that – compared to *Ec* – the two *Pseudomonas* species (*Pp* and *Pf*) showed reasonable potential as



305 chemical event logging chassis. This study advances an emerging frontier in synthetic biology that aims  
306 to build broad-host-range devices and understand the context by which different microbial species can  
307 execute programmable genetic operations.

308

## 309 **METHODS**

310 **Bacterial strains and cultivation.** The bacterial strains used in this study includes *Escherichia coli*  
311 DH5 $\alpha$  (New England Biolabs), *Escherichia coli* Nissle 1917 (isolated from probiotic Mutaflor capsule),  
312 *Pseudomonas fluorescens* SBW25 and *Pseudomonas putida* DSM 291 (DSMZ). All bacteria were  
313 cultured in Lauria-Bertani medium at 30 °C.

314

315 **Transformation.** *E. coli* DH5 $\alpha$  was transformed using standard chemical transformation protocol. For the  
316 other species, electrocompetent cells were prepared as follows: overnight cultures were diluted 1:100 into  
317 200 mL LB medium and grown to OD600 nm of about 0.3-0.4 (mid-log phase); cultures were harvested  
318 and spun down in four 50 mL centrifuge tubes at 5000 x g and the supernatant was discarded; cell pellets  
319 were resuspended in 15% glycerol, combined into one 50 mL centrifuge tube and collected via  
320 centrifugation at 5000 x g. This wash cycle was repeated twice and the final cell pellet was resuspended  
321 in 1 mL 15% glycerol for electroporation. The cells were then transformed by electroporation at 12500  
322 V/cm (200  $\Omega$  and 25  $\mu$ F) in 1 mm cuvettes. The entire protocol was successfully carried out at room  
323 temperature as outlined in the Tu et al. 2016 study<sup>36</sup>. The efficiency, in general, was found to be higher in  
324 the room-temperature methods than in conventional ice-cold methods.

325

326 **Plate reader and cytometry assays.** For each bacteria, three positive transformants were grown,  
327 passaged twice at 30 °C and then assayed in a 24-well plate at eight different IPTG concentrations (0,  
328 0.01, 0.05, 0.1, 0.2, 0.5, 0.8 and 1 mM). Each well of the plate contained 1.8 mL LB + kanamycin (50  
329  $\mu$ g/mL) + IPTG. A Synergy H1 (Biotek, Winooski, VT) was used as the fluorescent plate reader for all  
330 assays. 1  $\mu$ L samples were collected from each of the wells at various stages of growth and analyzed via

331 flow cytometry (Novocyte, ACEA biosciences, San Diego, CA). Simultaneously, 100  $\mu$ L samples were  
332 also collected and frozen at -80 °C. Plasmid DNA was later extracted from the frozen samples and used  
333 for real time qPCR assays to measure the fraction of device flipped.

334

335 **Real time quantitative PCR.** Real time PCR was performed by ARQ Genetics LLC (Bastrop, TX) on  
336 the BioRad CFX384 Real Time System (BioRad, Hercules, CA) using assays specific for each plasmid.  
337 All of the plasmid DNA was extracted with a Zyppy – 96 Plasmid Miniprep kit (Zymo, Irvine, CA)  
338 following the next steps: all of the stains were grown at 30 °C and harvested at 3-5 h intervals; the DNA  
339 was quantified by performing PicoGreen assay on the Biotek Synergy H1 (Biotek, Winooski, VT) and  
340 reactions were diluted to matching concentrations. Each reaction well contained 5  $\mu$ L of TaqMan  
341 Universal Master Mix II (Applied Biosystems, Waltham, MA), 2  $\mu$ L of each sample template and 0.5  $\mu$ L  
342 of each specific plasmid assay in a reaction volume of 10  $\mu$ L. Cycling conditions were as follows: 95 °C  
343 for 10 min for polymerase activation, followed by 40 cycles of 95 °C for 15 seconds and 63 °C for 1 min.  
344 Data analysis was performed using CFX Manager software from BioRad, version 3.1. The experimental  
345 Cq (cycle quantification) was calibrated against the standard curve for each plasmid orientation.

346

347 **Numerical simulation.** The system of ODEs were solved numerically using the ‘deSolve’ package<sup>37</sup> in  
348 R<sup>38</sup>. The results were fitted to experimental data to estimate the five kinetic rate constants ( $P_A$ ,  $P_B$ ,  $P_C$ ,  $D$   
349 and  $k_{flip}$ ) for each of the species in the model. The specific growth rate ( $\mu$ ) was calculated from measured  
350 OD600 nm at each time point and given as an input to the numerical solver.

351

352 **Reproducible analysis and data deposits.** The raw data for this study along with and the sequence  
353 information for the genetic construct pB2lacBxb1G-R (shown in Fig. 1b) are available from the Open  
354 Science Framework (OSF) under the name “A broad-host-range event detector: data and models” (DOI  
355 10.17605/OSF.IO/J295C) at <https://osf.io/j295c/>. This OSF project also contains the R Markdown scripts

356 that can be used to reproduce all of the analyses, statistics and technical graphs presented in this  
357 manuscript.

358

### 359 **CONFLICT OF INTEREST**

360 The authors have no conflict of interest to declare.

361

### 362 **ACKNOWLEDGMENTS**

363 This research was supported by funding from the National Security Directorate Seed Initiative, a  
364 Laboratory Directed Research and Development (LDRD) Program of Pacific Northwest National  
365 Laboratory (PNNL). PNNL is operated for the DOE by Battelle under contract no. DE-AC05-76RLO-  
366 1830. Specific acknowledgments are given to Rose Perry at PNNL and John Repass at Genetics for  
367 technical assistance with graphics and real time PCR. The authors would also like to thank Drs. Victoria  
368 Hsiao and Richard Murray for kindly sharing materials and knowledge.

## 369 REFERENCES CITED

- 370 1. Gardner, T. S.; Cantor, C. R.; Collins, J. J., Construction of a genetic toggle switch in *Escherichia*  
371 *coli*. *Nature* **2000**, *403* (6767), 339.
- 372 2. Elowitz, M. B.; Leibler, S., A synthetic oscillatory network of transcriptional regulators. *Nature*  
373 **2000**, *403* (6767), 335.
- 374 3. Hsiao, V.; Hori, Y.; Rothemund, P. W.; Murray, R. M., A population-based temporal logic gate for  
375 timing and recording chemical events. *Mol Syst Biol* **2016**, *12* (5), 869.
- 376 4. Yang, L.; Nielsen, A. A.; Fernandez-Rodriguez, J.; McClune, C. J.; Laub, M. T.; Lu, T. K.; Voigt, C. A.,  
377 Permanent genetic memory with > 1-byte capacity. *Nat Meth* **2014**, *11* (12), 1261.
- 378 5. Siuti, P.; Yazbek, J.; Lu, T. K., Synthetic circuits integrating logic and memory in living cells. *Nat*  
379 *Biotech* **2013**, *31* (5), 448.
- 380 6. Shur, A.; Murray, R. M., Proof of concept continuous event logging in living cells. *bioRxiv* **2018**,  
381 225151.
- 382 7. Riglar, D. T.; Giessen, T. W.; Baym, M.; Kerns, S. J.; Niederhuber, M. J.; Bronson, R. T.; Kotula, J.  
383 W.; Gerber, G. K.; Way, J. C.; Silver, P. A., Engineered bacteria can function in the mammalian gut long-  
384 term as live diagnostics of inflammation. *Nat Biotech* **2017**, *35* (7), 653.
- 385 8. Kotula, J. W.; Kerns, S. J.; Shaket, L. A.; Siraj, L.; Collins, J. J.; Way, J. C.; Silver, P. A.,  
386 Programmable bacteria detect and record an environmental signal in the mammalian gut. *Proc Nat Acad*  
387 *Sci* **2014**, *111* (13), 4838-4843.
- 388 9. Wang, B.; Barahona, M.; Buck, M., A modular cell-based biosensor using engineered genetic  
389 logic circuits to detect and integrate multiple environmental signals. *Biosens Bioelectron* **2013**, *40* (1),  
390 368-376.
- 391 10. Stocker, J.; Balluch, D.; Gsell, M.; Harms, H.; Feliciano, J.; Daunert, S.; Malik, K. A.; Van der Meer,  
392 J. R., Development of a set of simple bacterial biosensors for quantitative and rapid measurements of  
393 arsenite and arsenate in potable water. *Environ Sci Technol* **2003**, *37* (20), 4743-4750.
- 394 11. Tan, S. Z.; Reisch, C. R.; Prather, K. L., A Robust CRISPRi Gene Repression System in  
395 *Pseudomonas*. *J Bacteriol* **2018**, JB. 00575-17.
- 396 12. Nikel, P. I.; Martínez-García, E.; De Lorenzo, V., Biotechnological domestication of  
397 pseudomonads using synthetic biology. *Nat Rev Microbiol* **2014**, *12* (5), 368.
- 398 13. Nikel, P. I.; Chavarría, M.; Danchin, A.; de Lorenzo, V., From dirt to industrial applications:  
399 *Pseudomonas putida* as a synthetic biology chassis for hosting harsh biochemical reactions. *Curr Opin*  
400 *Chem Biol* **2016**, *34*, 20-29.
- 401 14. Kushwaha, M.; Salis, H. M., A portable expression resource for engineering cross-species genetic  
402 circuits and pathways. *Nat Commun* **2015**, *6*, 7832.
- 403 15. Yang, S.; Liu, Q.; Zhang, Y.; Du, G.; Chen, J.; Kang, Z., Construction and characterization of broad-  
404 spectrum promoters for synthetic biology. *ACS Synth Biol* **2017**, *7* (1), 287-291.
- 405 16. Ghosh, P.; Pannunzio, N. R.; Hatfull, G. F., Synapsis in phage Bxb1 integration: selection  
406 mechanism for the correct pair of recombination sites. *J Mol Biol* **2005**, *349* (2), 331-348.
- 407 17. Kovach, M. E.; Elzer, P. H.; Hill, D. S.; Robertson, G. T.; Farris, M. A.; Roop, R. M.; Peterson, K. M.,  
408 Four new derivatives of the broad-host-range cloning vector pBBR1MCS, carrying different antibiotic-  
409 resistance cassettes. *Gene* **1995**, *166* (1), 175-176.
- 410 18. Alon, U., *An introduction to systems biology: design principles of biological circuits*. CRC press:  
411 2006.
- 412 19. Hooshangi, S.; Thiberge, S.; Weiss, R., Ultrasensitivity and noise propagation in a synthetic  
413 transcriptional cascade. *Proc Nat Acad Sci* **2005**, *102* (10), 3581-3586.
- 414 20. Lou, C.; Stanton, B.; Chen, Y.-J.; Munsky, B.; Voigt, C. A., Ribozyme-based insulator parts buffer  
415 synthetic circuits from genetic context. *Nat Biotech* **2012**, *30* (11), 1137.

- 416 21. Siuti, P.; Yazbek, J.; Lu, T. K., Engineering genetic circuits that compute and remember. *Nat*  
417 *Protoc* **2014**, *9* (6), 1292.
- 418 22. Poblete-Castro, I.; Becker, J.; Dohnt, K.; Dos Santos, V. M.; Wittmann, C., Industrial  
419 biotechnology of *Pseudomonas putida* and related species. *Appl Microbiol Biotechnol* **2012**, *93* (6), 2279-  
420 2290.
- 421 23. Di Gioia, D.; Luziatelli, F.; Negroni, A.; Ficca, A. G.; Fava, F.; Ruzzi, M., Metabolic engineering of  
422 *Pseudomonas fluorescens* for the production of vanillin from ferulic acid. *J Biotechnol* **2011**, *156* (4),  
423 309-316.
- 424 24. Clarke, P. H., The metabolic versatility of pseudomonads. *Anton Van Leeuw* **1982**, *48* (2), 105-  
425 130.
- 426 25. Nelson, K.; Weinel, C.; Paulsen, I.; Dodson, R.; Hilbert, H.; Martins dos Santos, V.; Fouts, D.; Gill,  
427 S.; Pop, M.; Holmes, M., Complete genome sequence and comparative analysis of the metabolically  
428 versatile *Pseudomonas putida* KT2440. *Environ Microbiol* **2002**, *4* (12), 799-808.
- 429 26. Rainey, P. B.; Bailey, M. J., Physical and genetic map of the *Pseudomonas fluorescens* SBW25  
430 chromosome. *Molec Microbiol* **1996**, *19* (3), 521-533.
- 431 27. Silby, M. W.; Cerdeño-Tárraga, A. M.; Vernikos, G. S.; Giddens, S. R.; Jackson, R. W.; Preston, G.  
432 M.; Zhang, X.-X.; Moon, C. D.; Gehrig, S. M.; Godfrey, S. A., Genomic and genetic analyses of diversity  
433 and plant interactions of *Pseudomonas fluorescens*. *Genome Biol* **2009**, *10* (5), R51.
- 434 28. Compeau, G.; Al-Achi, B. J.; Platsouka, E.; Levy, S., Survival of rifampin-resistant mutants of  
435 *Pseudomonas fluorescens* and *Pseudomonas putida* in soil systems. *Appl Environ Microb* **1988**, *54* (10),  
436 2432-2438.
- 437 29. Isnansetyo, A.; Kamei, Y., Bioactive substances produced by marine isolates of *Pseudomonas*. *J*  
438 *Ind Microbiol Biot* **2009**, *36* (10), 1239-1248.
- 439 30. Schultz, M.; Burton, J., *Escherichia coli* Nissle 1917. In *The Microbiota in Gastrointestinal*  
440 *Pathophysiology*, Elsevier: 2017; pp 59-69.
- 441 31. Slomovic, S.; Pardee, K.; Collins, J. J., Synthetic biology devices for in vitro and in vivo diagnostics.  
442 *Proc Nat Acad Sci* **2015**, *112* (47), 14429-14435.
- 443 32. Danino, T.; Prindle, A.; Kwong, G. A.; Skalak, M.; Li, H.; Allen, K.; Hasty, J.; Bhatia, S. N.,  
444 Programmable probiotics for detection of cancer in urine. *Sci Transl Med* **2015**, *7* (289), 289ra84-  
445 289ra84.
- 446 33. Sedlmayer, F.; Fussenegger, M., Synthetic biology: A probiotic probe for inflammation. *Nat*  
447 *Biomed Eng* **2017**, *1* (7), 0097.
- 448 34. Mimee, M.; Tucker, A. C.; Voigt, C. A.; Lu, T. K., Programming a human commensal bacterium,  
449 *Bacteroides thetaiotaomicron*, to sense and respond to stimuli in the murine gut microbiota. *Cell Syst*  
450 **2015**, *1* (1), 62-71.
- 451 35. Leonard, S. P.; Perutka, J.; Powell, J. E.; Geng, P.; Richhart, D. D.; Byrom, M.; Kar, S.; Davies, B.  
452 W.; Ellington, A. D.; Moran, N. A., Genetic engineering of bee gut microbiome bacteria with a toolkit for  
453 modular assembly of broad-host-range plasmids. *ACS Synth Biol* **2018**, *7* (5), 1279-1290.
- 454 36. Tu, Q.; Yin, J.; Fu, J.; Herrmann, J.; Li, Y.; Yin, Y.; Stewart, A. F.; Müller, R.; Zhang, Y., Room  
455 temperature electrocompetent bacterial cells improve DNA transformation and recombineering  
456 efficiency. *Sci Rep* **2016**, *6*, 24648.
- 457 37. Soetaert, K.; Petzoldt, T.; Setzer, R. W., Solving differential equations in R: package deSolve. *J*  
458 *Stat Software* **2010**, *33*.
- 459 38. Team, R. C., R: A language and environment for statistical computing. **2013**.
- 460

462 **FIGURE LEGENDS**

463 **Figure 1. The broad-host range event logger and its modes of operation.** (a) Expression of the Bxb1  
464 integrase was controlled by the  $P_{lac}$  promoter and respective IPTG concentrations. Mature Bxb1 proteins  
465 dimerize and bind to DNA recombination sites ( $attB$  and  $attP$ ). The dimers on the two ends of the  
466 recording element join to form a tetramer in a synaptic event that folds the DNA in the process. DNA  
467 strands are exchanged when Bxb1 monomers trade positions, flipping the internal region, which contains  
468 both a barcoded digital recorder and a constitutive  $P_{lac}$  promoter. The new sites,  $attL$  and  $attR$  – formed in  
469 the process of DNA flipping – can no longer stay attached to the *Bxb1* dimers because of altered  
470 sequence, therefore release the dimers in an irreversible digital recording process. GFP and RFP reporter  
471 genes were transcriptionally fused onto the IPTG inducible sensor and recording recombination sites. (b)  
472 Map of the device with the sensor and memory components cloned in place of the *lacZ* gene on the  
473 *pBBR1MCS2* broad-host-range vector.

474

475 **Figure 2. Quantifying the chassis effect.** (a) The top four panels represent cell growth (OD600 nm), at  
476 different IPTG concentrations, of *E. coli* DH5 $\alpha$ , *E. coli* Nissle 1917, *P. putida* DSM 291 and *P.*  
477 *fluorescens* SBW25 from left to right respectively. The middle row of graphs represents the fluorescence  
478 output of the GFP reporter that was transcriptionally fused to the sensor element; the bottom row  
479 represents the fluorescence output from the RFP that was fused to the memory component. (b) The  
480 maximum GFP and RFP fluorescence at different IPTG concentrations. (c) The activation coefficient  
481 shown as half-saturation times of GFP and RFP at different IPTG concentration (> 0 mM IPTG).

482

483 **Figure 3. Population-based measurements of RFP reporting of signal recording across hosts.** (a)  
484 *Escherichia coli* DH5 $\alpha$ , (b) *Escherichia coli* Nissle 1917, (c) *Pseudomonas putida* DSM 291 and (d)  
485 *Pseudomonas fluorescens* SBW25. The rows in each of the panels correspond with sampling times in  
486 hours and columns are the IPTG concentrations given in mM. The first row in each plot shows data from  
487 the induction state from each experiment (0 h).

488

489 **Figure 4. Comparative kinetics show chassis-dependent performance.** The model outputs (dotted  
490 lines) of **(a)** the sensor component as fit by GFP fluorescence data; **(b)** the memory component as fit by  
491 RFP fluorescence; and **(c)** the memory component as fit by the fraction of DNA flipped (qPCR  
492 measurements). Each simulated time trace (panels a through c) are overlaid on the respective data typed  
493 used to parameterize the model (solid lines). **(d)** The promoter strength of  $P_{lac}$  (given in the model as  $P$ )  
494 calculated from estimated model parameters,  $P_A$ ,  $P_B$  and  $P_C$ , plotted against IPTG concentration. **(e)**  
495 Comparison of simulated kinetic parameters for the protein degradation constant ( $D$ ); flipping constant  
496 ( $k_{flip}$ ) and strength of the constitutive  $P_{tac}$  promoter ( $P_{RFP}$ ) compared across each host.
